# Supplementary material for: Compliance with recommended cancer patient pathway timeframes and choice of treatment differed by cancer type and place of residence among cancer patients in Norway in 2015–2016
Source: PubMed Central journal article supplement (PMC8883731; doi:10.1186/s12885-022-09306-9), 2022-02-28
Supplement: 12885_2022_9306_MOESM1_ESM.pdf [file 12885_2022_9306_MOESM1_ESM.pdf]

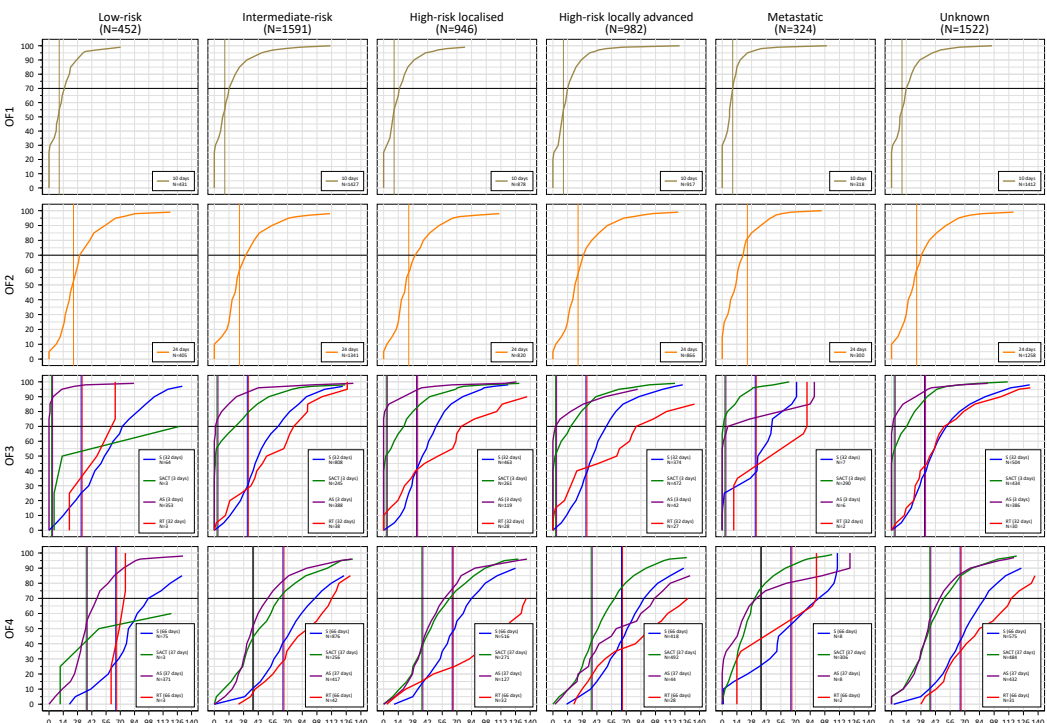

**Supplementary Figure 1:** The cumulative proportion per risk group of prostate cancer patients diagnosed in 2015-2016 in Norway by OF1, OF2, OF3 and OF4.
